# Supplementary material for: A Prediction Model for Progression of preserved ratio impaired spirometry (PRISm) Based on Longitudinal Pulmonary Function Trajectories
Source: Research Square preprint supplement (doi:10.21203/rs.3.rs-8716601/v1), 2026-02-17
Supplement: Supplementary file 1 [file f132782e17848118ac7f093a.docx]

**Questionnaire for Patients with Preserved Ratio Impaired Spirometry (PRISm)**

This questionnaire includes single-choice, multiple-choice, and open-ended questions. The estimated completion time is 4-6 minutes.

**Part I. Demographic Information**

Name: _________

Gender: _________

Age (years): _________

Current Height (cm): _________

Current Weight (kg): _________

Place of Residence: □ Urban □ Rural

Contact Telephone Number: _________

Highest Education Level Attained:

□ Junior high school or below

□ Senior high school or technical secondary school

□ College (associate degree) or above

Family History of Chronic Respiratory Diseases: □ Yes □ No

History of Respiratory Diseases in Childhood: □ Yes □ No

**Part II. Lifestyle Factors**

Occupational Exposure to Dust or Smoke: □ Yes □ No

Use of Biomass Fuels (e.g., coal, crop residues): □ Yes □ No

Smoking Habit: □ Yes □ No

Smoking History (Pack-Years):

□ Never smoker

□ < 10 pack-years

□ 10-20 pack-years

□ > 20 pack-years

Current Smoking Status (If applicable):

□ Former smoker

□ Current smoker

Years Since Smoking Cessation (For former smokers):

□ < 5 years

□ ≥ 5 years

Exposure to Secondhand Smoke (Defined as being in the same room with a smoker for >15 minutes per occasion and ≥3 times per week): □ Yes □ No

Alcohol Consumption Habit: □ Yes □ No

Regular Physical Exercise: □ Yes □ No

**Part III. Symptoms and Comorbidities**

Has a doctor ever diagnosed you with asthma? □ Yes □ No

Has a doctor ever diagnosed you with pulmonary tuberculosis? □ Yes □ No

Has a doctor ever told you that you have cardiovascular diseases? □ Yes □ No

Has a doctor ever told you that you have diabetes? □ Yes □ No

Has a doctor ever told you that you have hyperlipidemia? □ Yes □ No

Has a doctor ever told you that you have metabolic syndrome? □ Yes □ No

Has a doctor ever told you that you have immune system disorders? □ Yes □ No

Has a doctor ever told you that you have anxiety or depression? □ Yes □ No

**COPD Assessment Test (CAT) score**


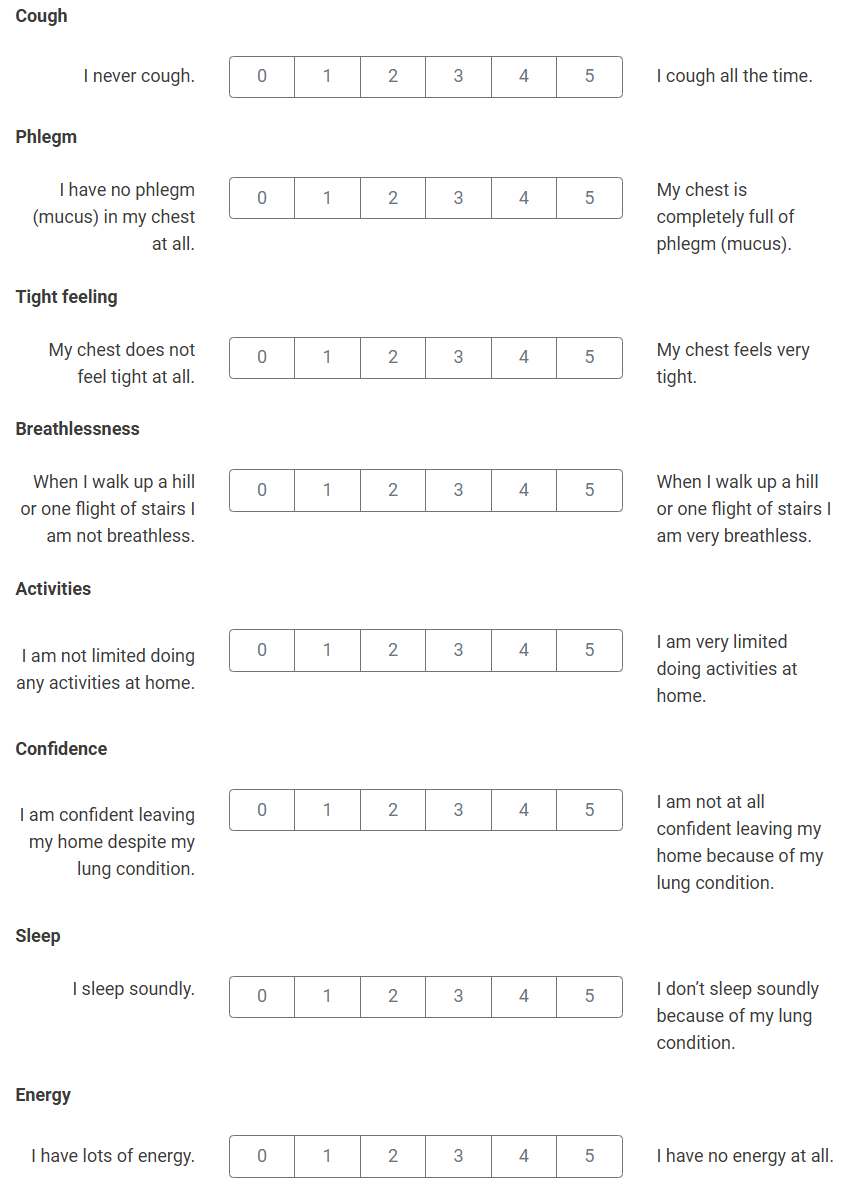


**modified Medical Research Council (mMRC) dyspnea score**（Select the one grade from 0 to 4 that best matches your condition.）

□0 I only get breathless with strenuous exercise.

□1 I get short of breath when hurrying on level ground or walking up a slight hill.

□2 I walk slower than people of the same age on level ground because of breathlessness, OR I have to stop for breath when walking at my own pace on level ground.

□3 I stop for breath after walking about 100 meters or after a few minutes on level ground.

□4 I am too breathless to leave the house OR I am breathless when dressing or undressing.

**Clinical COPD Questionnaire (CCQ) score**

On average, during the past week, how often did you feel short of breath at rest?

□Never □Hardly ever □A few times □Several times □Many times

On average, during the past week, how often did you feel short of breath while doing physical activities?

□Never □Hardly ever □A few times □Several times □Many times

On average, during the past week, how often did you cough?

□Never □Hardly ever □A few times □Several times □Many times

On average, during the past week, how often did you produce sputum (phlegm)?

□Never □Hardly ever □A few times □Several times □Many times

On average, during the past week, how limited were you in these activities because of your breathing problems: Strenuous physical activities (e.g., hurrying, doing sports, carrying heavy loads)?

□Never □Hardly ever □A few times □Several times □Many times

On average, during the past week, how limited were you in these activities because of your breathing problems: Moderate physical activities (e.g., walking, housework, carrying groceries)?

□Never □Hardly ever □A few times □Several times □Many times

On average, during the past week, how limited were you in these activities because of your breathing problems: Daily activities at home (e.g., dressing, washing)?

□Never □Hardly ever □A few times □Several times □Many times

On average, during the past week, how limited were you in these activities because of your breathing problems: Social activities (e.g., talking, being with children, visiting friends/relatives)?

□Never □Hardly ever □A few times □Several times □Many times

On average, during the past week, how often did you feel concerned or worried about getting a cold or your breathing getting worse?

□Never □Hardly ever □A few times □Several times □Many times

On average, during the past week, how often did you feel down or low because of your breathing problems?

□Never □Hardly ever □A few times □Several times □Many times
